# Supplementary material for: Outcome After Breast Reduction Considering Body Mass Index and Resection Amount
Source: Oxford University Press journal article supplement (doi:10.1093/asj/sjx110), 2017-08-21
Supplement: sjx110_suppl_appendix_a.docx [file sjx110_suppl_appendix_a.docx]

**Appendix A.** The Standardized Questionnaire Prepared for the Evaluation of Patients General Health Status Along with the Quality of Life

| **General Questions:** |
| --- |
| **Name/surname** |
| **Age** |
| **Weight** |
| **Height** |
| **Date of operation** |
| **Endocrinologic status (Hormonal disease, menopause)** |
| **Daily diet status** |
| **Daily sportive activities** |
| **DAS-59 Questions*:** |
| **SBSC Q-4: Avoiding undressing in front of partner** |
| **SBSC Q-9: Acoiding communal changing rooms** |
| **SBSC Q-23: Adverse effect on sex life** |
| **SBSC Q-24: Adverse effect on marriage** |
| **SBSC Q-37: Distress when going to the beach** |
| **SBSC Q-43: Distress from being unable to wear favorite clothes** |
| **SBSC Q-46: Distress from being unable to play games** |
| **SBSC Q-49: Distress from being unable to look in the mirror** |
| **NSC Q-52: How confident do you feel?** |
| **NSC Q-54: How secure do you feel?** |
| **NSC Q-55: How cheerful do you feel?** |
| **NSC Q-56: How normal do you feel?** |
| **NSC Q-57: How feminine do you feel?** |
|  |
| * The answers should be given between 0 (Zero) to 5 (Five) 0 (Zero) is considered as the best answer indicating excellent psychosocial state whereas 5 (Five) is considered the worst answer indicating a bad psychosocial state. |
